# Supplementary material for: Influence of a bifunctional linker on the loading of Cu2AgInS4 QDs onto porous TiO2 NFs to use as an efficient photoanode to boost the photoconversion efficiency of QDSCs
Source: Royal Society of Chemistry journal article supplement (doi:10.1039/d0nj01699c), 2020-01-01
Supplement: d0nj01699c1.pdf [file d0nj01699c1.pdf]

## Supplementary Information

---

### **Influence of bifunctional linker on loading of Cu<sub>2</sub>AgInS<sub>4</sub> QDs onto porous TiO<sub>2</sub> NFs to use as an efficient photoanode to boost up the photoconversion efficiency of QDSC**

Roopakala Kottayi<sup>a,b</sup>, Pratheep Panneerselvam<sup>a</sup>, Nisha Singh<sup>a</sup>, Vignesh Murugadoss<sup>a</sup>,  
Ramadasse Sittaramane<sup>b</sup>, Subramania Angaiah<sup>a\*</sup>

<sup>a</sup>Electro-Materials Research Laboratory,  
Centre for Nanoscience and Technology, Pondicherry University,  
Puducherry -605014, India

<sup>b</sup> Department of Physics,  
Kanchi Mamunivar Govt. Institute for PG Studies and Research,  
Puducherry-605008, India

(\*Corresponding author; E mail: [a.subramania@gmail.com](mailto:a.subramania@gmail.com))

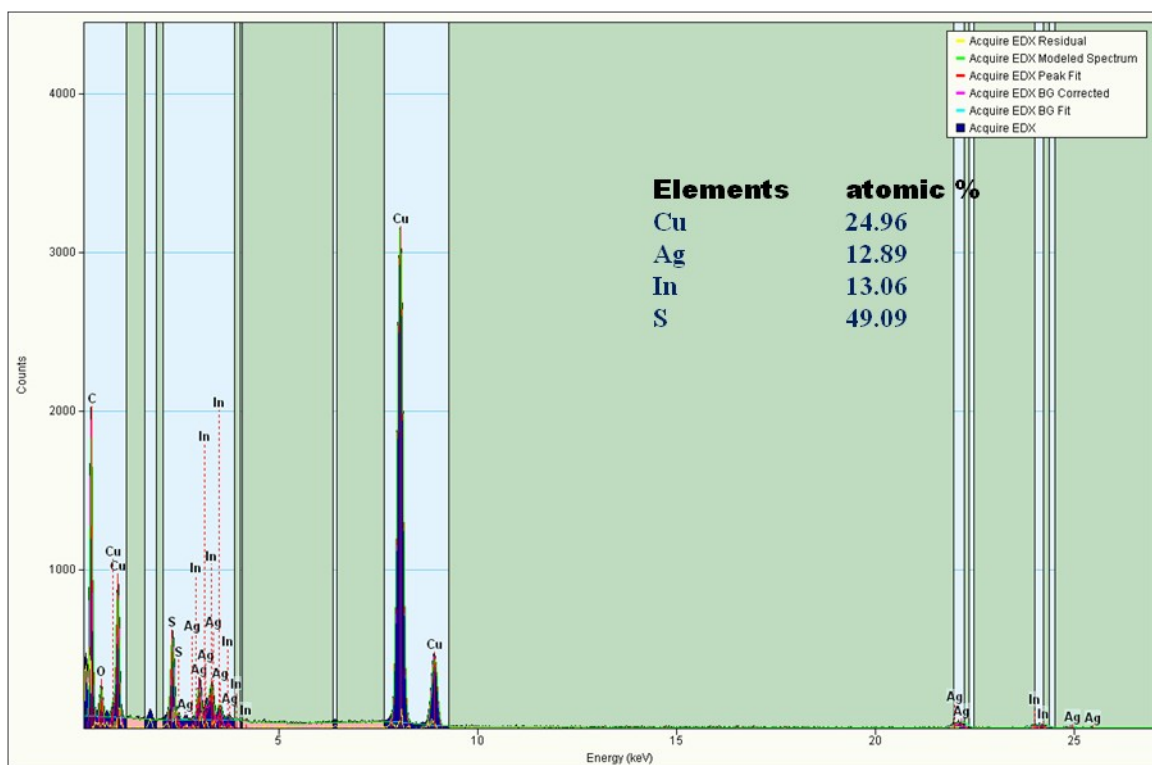

Fig. S1 EDX spectrum of CAIS QDs
